# Supplementary material
Source: PubMed Central journal article supplement (PMC5627200)
Supplement: rspb20171182supp2.pdf [file rspb20171182supp2.pdf]

Gelatinous

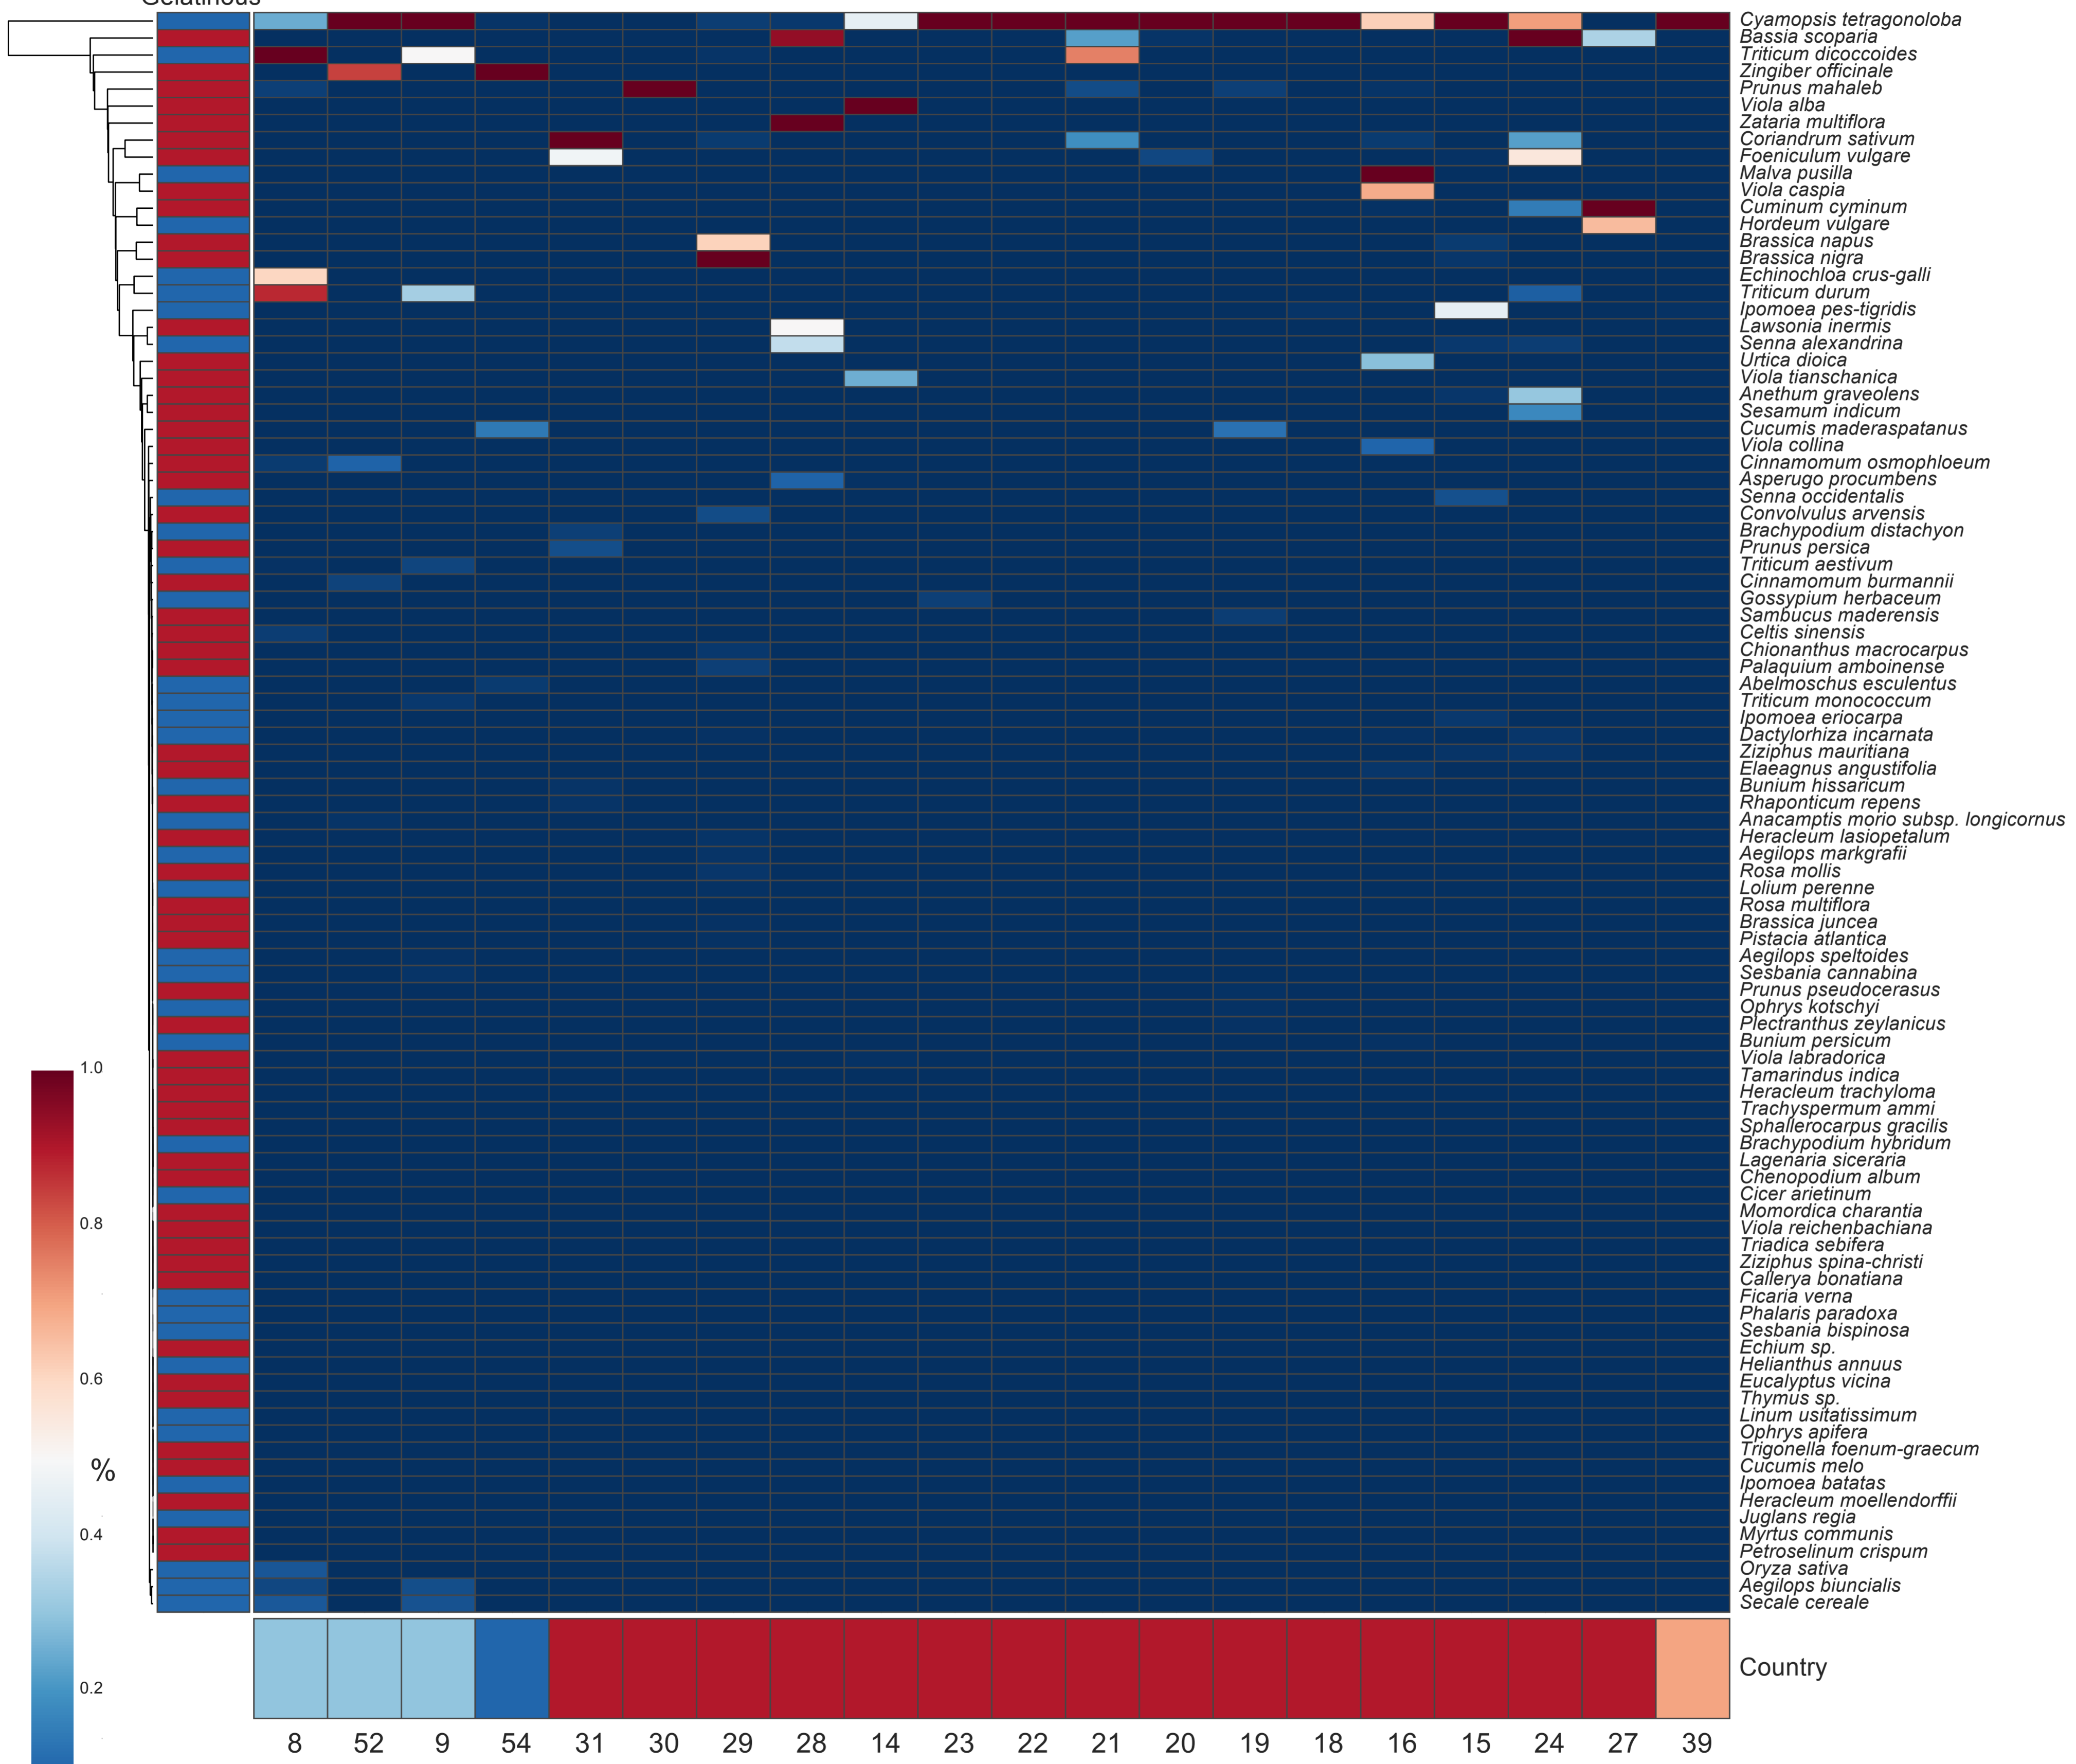

Relative Abundance

1.0

0.8

0.6

0.4

0.2

0.0

%

**Country:**

Germany

Iran

United Kingdom

Turkey

**Gelatinous:**

Non Gelatinous

Gelatinous

- Cyamopsis tetragonoloba*
- Bassia scoparia*
- Triticum dicoccoides*
- Zingiber officinale*
- Prunus mahaleb*
- Viola alba*
- Zataria multiflora*
- Coriandrum sativum*
- Foeniculum vulgare*
- Malva pusilla*
- Viola caspia*
- Cuminum cyminum*
- Hordeum vulgare*
- Brassica napus*
- Brassica nigra*
- Echinochloa crus-galli*
- Triticum durum*
- Ipomoea pes-tigridis*
- Lawsonia inermis*
- Senna alexandrina*
- Urtica dioica*
- Viola tianschanica*
- Anethum graveolens*
- Sesamum indicum*
- Cucumis maderaspatanus*
- Viola collina*
- Cinnamomum osmophloeum*
- Asperugo procumbens*
- Senna occidentalis*
- Convolvulus arvensis*
- Brachypodium distachyon*
- Prunus persica*
- Triticum aestivum*
- Cinnamomum burmannii*
- Gossypium herbaceum*
- Sambucus maderensis*
- Celtis sinensis*
- Chionanthus macrocarpus*
- Palaquium amboinense*
- Abelmoschus esculentus*
- Triticum monococcum*
- Ipomoea eriocarpa*
- Dactylorhiza incarnata*
- Ziziphus mauritiana*
- Elaeagnus angustifolia*
- Bunium hissaricum*
- Rhaponticum repens*
- Anacamptis morio subsp. longicornus*
- Heracleum lasiopetalum*
- Aegilops markgrafii*
- Rosa mollis*
- Lolium perenne*
- Rosa multiflora*
- Brassica juncea*
- Pistacia atlantica*
- Aegilops speltoides*
- Sesbania cannabina*
- Prunus pseudocerasus*
- Ophrys kotschy*
- Plectranthus zeylanicus*
- Bunium persicum*
- Viola labradorica*
- Tamarindus indica*
- Heracleum trachyloma*
- Trachyspermum ammi*
- Sphallerocarpus gracilis*
- Brachypodium hybridum*
- Lagenaria siceraria*
- Chenopodium album*
- Cicer arietinum*
- Momordica charantia*
- Viola reichenbachiana*
- Triadica sebifera*
- Ziziphus spina-christi*
- Callerya bonatiana*
- Ficaria verna*
- Phalaris paradoxa*
- Sesbania bispinosa*
- Echium sp.*
- Helianthus annuus*
- Eucalyptus vicina*
- Thymus sp.*
- Linum usitatissimum*
- Ophrys apifera*
- Trigonella foenum-graecum*
- Cucumis melo*
- Ipomoea batatas*
- Heracleum moellendorffii*
- Juglans regia*
- Myrtus communis*
- Petroselinum crispum*
- Oryza sativa*
- Aegilops biuncialis*
- Secale cereale*

Country

8 52 9 54 31 30 29 28 14 23 22 21 20 19 18 16 15 24 27 39
