# Supplementary material
Source: PubMed Central journal article supplement (PMC5627200)
Supplement: rspb20171182supp3.pdf [file rspb20171182supp3.pdf]

| Sample no. | Sample type                  | Brand name       | Country origin | City (country) purchased | Salep claimed as ingredients | Form of DNA after extraction | Qubit DNA (ng/μl) | Fragment analyser DNA (ng/μl) |          | PGM Barcode |
|------------|------------------------------|------------------|----------------|--------------------------|------------------------------|------------------------------|-------------------|-------------------------------|----------|-------------|
|            |                              |                  |                |                          |                              |                              |                   | PCR ITS1                      | PCR ITS2 |             |
| 1          | Processed and packed product | Commercial brand | Turkey         | Mainz (Germany)          | Yes                          | Liquid                       | 3,27              | 1,14                          | 4,81     | Chip 1-1    |
| 2          | Processed and packed product | Commercial brand | Turkey         | Würzburg (Germany)       | Yes                          | Liquid                       | 3,02              | 1,07                          | 1,6      | Chip 1-2    |
| 3          | Processed and packed product | Commercial brand | Turkey         | Koln (Germany)           | Yes                          | Liquid                       | 3,36              | 0,72                          | 4,42     | Chip 1-3    |
| 4          | Processed and packed product | Commercial brand | Turkey         | Mainz (Germany)          | Yes                          | Liquid                       | 0,868             | 0,44                          | 4,59     | Chip 1-4    |
| 5          | Processed and packed product | Commercial brand | Turkey         | Stuttgart (Germany)      | Yes                          | Liquid                       | 0,704             | 0,71                          | 1,79     | Chip 1-5    |
| 6          | Processed and packed product | Commercial brand | Turkey         | Stuttgart (Germany)      | Yes                          | Liquid                       | 1,02              | 0,27                          | 1,11     | Chip 1-6    |
| 7          | Processed and packed product | Commercial brand | Turkey         | Stuttgart (Germany)      | Yes                          | Liquid                       | 0,892             | 0,33                          | 1,06     | Chip 1-7    |
| 8          | Processed and packed product | Commercial brand | Turkey         | Koln (Germany)           | Flavoring                    | Liquid                       | -                 | 0                             | 1,23     | Chip 1-8    |
| 9          | Processed and packed product | Commercial brand | Turkey         | Düsseldorf (Germany)     | Flavoring                    | Liquid                       | -                 | 4,17                          | 3,2      | Chip 1-9    |
| 10         | Processed and packed product | Commercial brand | Turkey         | Stuttgart (Germany)      | Flavoring                    | Liquid                       | 0,504             | 3,09                          | 2,52     | Chip 1-10   |
| 11         | Processed and packed product | Commercial brand | Turkey         | Stuttgart (Germany)      | Yes                          | Liquid                       | 1,43              | 7,84                          | 3,79     | Chip 1-11   |
| 12         | Processed and packed product | Commercial brand | Turkey         | Stuttgart (Germany)      | Yes                          | Gel                          | 1,34              | 6,72                          | 9,28     | Chip 1-12   |
| 13         | Processed and packed product | Commercial brand | Turkey         | Stuttgart (Germany)      | Flavoring                    | Liquid                       | 1,04              | 1                             | 0,77     | Chip 1-13   |
| 14         | Powder, not packed           | Herbal shop      | Iran           | Tehran                   | Yes                          | Gel                          | -                 | 0,54                          | 2,37     | Chip 1-14   |
| 15         | Powder, not packed           | Herbal shop      | Iran           | Tehran                   | Yes                          | Gel                          | -                 | 0,19                          | 3,97     | Chip 1-15   |
| 16         | Powder, not packed           | Herbal shop      | Iran           | Tehran                   | Yes                          | Gel                          | -                 | 0                             | 0,75     | Chip 1-16   |
| 17         | Powder, not packed           | Herbal shop      | Iran           | Tehran                   | Yes                          | Gel                          | 4,32              | 2,26                          | 1,53     | Chip 1-17   |
| 18         | Powder, not packed           | Herbal shop      | Iran           | Tehran                   | Yes                          | Gel                          | -                 | 0,78                          | 0,46     | Chip 1-18   |
| 19         | Powder, not packed           | Herbal shop      | Iran           | Tehran                   | Yes                          | Liquid                       | -                 | 0,24                          | 0        | Chip 1-19   |
| 20         | Powder, not packed           | Herbal shop      | Iran           | Shahindezh               | Yes                          | Gel                          | 0,488             | 1,81                          | 0        | Chip 1-20   |
| 21         | Powder, not packed           | Herbal shop      | Iran           | Shahindezh               | Yes                          | Gel                          | -                 | 0,82                          | 0        | Chip 1-21   |
| 22         | Powder, not packed           | Herbal shop      | Iran           | Shahindezh               | Yes                          | Gel                          | -                 | 0                             | 0,2      | Chip 1-22   |
| 23         | Powder, not packed           | Herbal shop      | Iran           | Shahindezh               | Yes                          | Gel                          | -                 | 0                             | 0,28     | Chip 1-23   |
| 24         | Powder, not packed           | Herbal shop      | Iran           | Kermanshah               | Yes                          | Gel                          | -                 | 0,5                           | 0,42     | Chip 1-24   |
| 25         | Powder, not packed           | Herbal shop      | Iran           | Kermanshah               | Yes                          | Gel                          | 0,564             | 0                             | 0        | Chip 1-25   |
| 26         | Powder, not packed           | Herbal shop      | Iran           | Kermanshah               | Yes                          | Gel                          | 0,684             | 3                             | 2,67     | Chip 1-26   |
| 27         | Powder, not packed           | Herbal shop      | Iran           | Karaj                    | Yes                          | Gel                          | -                 | 0                             | 0        | Chip 1-27   |
| 28         | Powder, not packed           | Herbal shop      | Iran           | Urmieh                   | Yes                          | Gel                          | -                 | 0,2                           | 0        | Chip 2-1    |
| 29         | Powder, not packed           | Herbal shop      | Iran           | Urmieh                   | Yes                          | Gel                          | -                 | 0,3                           | 0        | Chip 2-2    |
| 30         | Powder, not packed           | Herbal shop      | Iran           | Urmieh                   | Yes                          | Gel                          | -                 | 0                             | 0        | Chip 2-3    |
| 31         | Powder, not packed           | Herbal shop      | Iran           | Tabriz                   | Yes                          | Liquid                       | 0,472             | 0,5                           | 0,1      | Chip 2-4    |
| 32         | Powder, not packed           | Herbal shop      | Iran           | Tabriz                   | Yes                          | Liquid                       | 9,52              | 0                             | 0        | Chip 2-5    |
| 33         | Powder, not packed           | Herbal shop      | Turkey         | Antalya                  | Yes                          | Liquid                       | 2,03              | 0,24                          | 6,87     | Chip 2-6    |
| 34         | Powder, not packed           | Herbal shop      | Turkey         | Antalya                  | Yes                          | Liquid                       | 17,6              | 7,25                          | 2,7      | Chip 2-7    |
| 35         | Powder, not packed           | Herbal shop      | Turkey         | Istanbul                 | Yes                          | Liquid                       | 37,3              | 2,29                          | 7,8      | Chip 2-8    |
| 36         | Powder, not packed           | Herbal shop      | Turkey         | Istanbul                 | Yes                          | Liquid                       | 9,68              | 8,46                          | 5,83     | Chip 2-9    |
| 37         | Powder, not packed           | Herbal shop      | Turkey         | Nevsehir                 | Yes                          | Liquid                       | 0,932             | 3,94                          | 0,58     | Chip 2-10   |
| 38         | Processed and packed product | Commercial brand | Turkey         | Düsseldorf (Germany)     | Yes                          | Liquid                       | 1,05              | 1,76                          | 3,19     | Chip 2-11   |
| 39         | Processed and packed product | Commercial brand | Turkey         | Istanbul                 | Yes                          | Liquid                       | -                 | 2,65                          | 4,66     | Chip 2-12   |
| 40         | Processed and packed product | Commercial brand | Turkey         | Istanbul                 | Yes                          | Liquid                       | 1,88              | 0,5                           | 5,9      | Chip 2-13   |
| 41         | Processed and packed product | Commercial brand | Turkey         | Istanbul                 | Yes                          | Liquid                       | 5,24              | 4,79                          | 4        | Chip 2-14   |
| 42         | Processed and packed product | Commercial brand | Turkey         | Amsterdam (Netherlands)  | Yes                          | Liquid                       | 0,82              | 0,2                           | 1,5      | Chip 2-15   |
| 43         | Powder, not packed           | Herbal shop      | Greece         | Olympos                  | Yes                          | Liquid                       | 1,38              | 0                             | 0        | Chip 2-16   |
| 44         | Powder, not packed           | Herbal shop      | Greece         | Plikati                  | Yes                          | Liquid                       | 0,76              | 0                             | 0        | Chip 2-17   |
| 45         | Powder, not packed           | Herbal shop      | Greece         | Samarina                 | Yes                          | Liquid                       | 0,828             | 0                             | 0        | Chip 2-18   |
| 46         | Powder, not packed           | Herbal shop      | Greece         | Oistrato                 | Yes                          | Liquid                       | 1,93              | 0                             | 0        | Chip 2-19   |
| 47         | Powder, not packed           | Herbal shop      | Greece         | Thessaloniki             | Yes                          | Liquid                       | 3,02              | 0                             | 0        | Chip 2-20   |
| 48         | Processed and packed product | Commercial brand | Greece         | Thessaloniki             | Yes                          | Liquid                       | 1,61              | 0                             | 0        | Chip 2-21   |
| 49         | Processed and packed product | Commercial brand | Greece         | Thessaloniki             | Yes                          | Gel                          | 1,23              | 0                             | 0        | Chip 2-22   |
| 50         | Processed and packed product | Commercial brand | Greece         | Thessaloniki             | Yes                          | Liquid                       | 1,52              | 0,2                           | 0,1      | Chip 2-23   |
| 51         | Processed and packed product | Commercial brand | Greece         | Thessaloniki             | Yes                          | Gel                          | 3,15              | 0                             | 0        | Chip 2-24   |
| 52         | Processed and packed product | Commercial brand | Turkey         | Düsseldorf (Germany)     | Yes                          | Liquid                       | 0,4               | 2,59                          | 0,1      | Chip 2-25   |
| 53         | Hot beverage                 | Street vendor    | Greece         | Alexandros               | Yes                          | Liquid                       | 3,7               | 1                             | 0        | Chip 2-26   |
| 54         | Hot beverage                 | Street vendor    | Greece         | Kalamaria                | Yes                          | Liquid                       | -                 | 0                             | 0        | Chip 2-27   |
| 55         | Ice-cream                    | Pastisserie      | Greece         | Greece                   | Yes                          | Liquid                       | 60,4              | 2,99                          | 0,19     | Chip 2-28   |
