# Supplementary material
Source: PubMed Central journal article supplement (PMC5627200)
Supplement: rspb20171182supp6.pdf [file rspb20171182supp6.pdf]

**De Boer et al. DNA metabarcoding of orchid-derived products reveals widespread illegal orchid trade. Proceedings of the Royal Society B. DOI: 10.1098/rspb.2017-1182**

**Table S4.** Plant species detected in more than 20 % of samples, excluding orchids (presence as % in total samples in parentheses).

|                                                                          |     |
|--------------------------------------------------------------------------|-----|
| <i>Aegilops lorentii</i> Hochst.                                         | 47% |
| <i>Aegilops speltoides</i> Tausch                                        | 27% |
| <i>Anthosachne multiflora</i> (Banks & Sol. ex Hook.f.) C.Yen & J.L.Yang | 20% |
| <i>Coriandrum sativum</i> L.                                             | 23% |
| <i>Cucumis melo</i> L.                                                   | 20% |
| <i>Cyamopsis tetragonoloba</i> (L.) Taub.                                | 70% |
| <i>Ficaria verna</i> Huds.                                               | 33% |
| <i>Hordeum vulgare</i> L.                                                | 33% |
| <i>Ipomoea eriocarpa</i> R.Br.                                           | 27% |
| <i>Ipomoea pes-tigridis</i> L.                                           | 50% |
| <i>Medicago truncatula</i> Gaertn.                                       | 30% |
| <i>Momordica charantia</i> L.                                            | 20% |
| <i>Prunus mahaleb</i> L.                                                 | 33% |
| <i>Prunus pseudocerasus</i> Lindl.                                       | 20% |
| <i>Secale cereale</i> L.                                                 | 43% |
| <i>Triticum aestivum</i> L.                                              | 43% |
| <i>Triticum dicoccoides</i> (Körn. ex Asch. & Graebn.) Schweinf.         | 60% |
| <i>Triticum durum</i> Desf.                                              | 47% |
| <i>Triticum monococcum</i> L.                                            | 20% |
| <i>Zea mays</i> L.                                                       | 20% |
