# Supplementary material
Source: PubMed Central journal article supplement (PMC5627200)
Supplement: rspb20171182supp7.pdf [file rspb20171182supp7.pdf]

**De Boer et al. DNA metabarcoding of orchid-derived products reveals widespread illegal orchid trade. Proceedings of the Royal Society B. DOI: 10.1098/rspb.2017-1182**

**Table S5.** Unexpected species detected in samples (presence as % in total samples in parentheses).

| <b>Species identified</b>                                        | <b>Marker</b> | <b>Present (%)</b> | <b>Comment</b>                                                                                                |
|------------------------------------------------------------------|---------------|--------------------|---------------------------------------------------------------------------------------------------------------|
| <i>Agastache pallida</i> (Lindl.)<br>Cory                        | ITS           | 3%                 | Genus of horticultural value with native distribution mainly in North America                                 |
| <i>Callerya bonatiana</i> (Pamp.)<br>P.K.Lôc                     | ITS1          | 13%                | Species native to Yunnan in a more widely distributed genus related to Wisteria                               |
| <i>Caulophyllum robustum</i><br>Maxim.                           | ITS1          | 3%                 | Common medicinal plant species                                                                                |
| <i>Combretum mkuzense</i><br>J.D.Carr & Retief                   | ITS1          | 7%                 | Shrub from sub-Saharan Africa                                                                                 |
| <i>Dombeya autumnalis</i> Verd.                                  | ITS1          | 3%                 | Genus of horticultural value, also known as 'tropical hydrangeas'                                             |
| <i>Eperua</i> sp.                                                | ITS1          | 7%                 | Tropical legume trees/bushes                                                                                  |
| <i>Myosotis krylovii</i> Serg.                                   | ITS2          | 3%                 | Species occurring outside harvesting area, but in a widely distributed genus with low interspecific variation |
| <i>Nuxia oppositifolia</i> (Hochst.)<br>Benth.                   | ITS1          | 10%                | Genus of horticultural value with native distribution mainly in Africa                                        |
| <i>Sphallerocarpus gracilis</i><br>(Besser ex Trevir.) Koso-Pol. | ITS2          | 3%                 | Monotypic genus ranging from Eastern Asia                                                                     |
| <i>Tetradium ruticarpum</i><br>(A.Juss.) T.G.Hartley             | ITS2          | 3%                 | Common medicinal plant species                                                                                |
| <i>Vachellia hebeclada</i> (DC.)<br>Kyal. & Boatwr.              | ITS1          | 3%                 | Genus of horticultural value with native distribution mainly in Africa                                        |
